# Supplementary material
Source: PubMed Central journal article supplement (PMC3946565)
Supplement: NIHMS522435-supplement-1_si_001.pdf [file NIHMS522435-supplement-1_si_001.pdf]

## SUPPLEMENTARY INFORMATION

### Insight into $\alpha$ -Synuclein Misfolding and Plasticity from Differential Micelle Binding

Parichita Mazumder, Jae-Eun Suk and Tobias S. Ulmer

Department of Biochemistry & Molecular Biology, Zilkha Neurogenetic Institute, Keck School of Medicine, University of Southern California, 1501 San Pablo Street, Los Angeles, CA 90033, USA

|                                                                                                              |     |
|--------------------------------------------------------------------------------------------------------------|-----|
| <b>Figure S1.</b> CG molecular dynamics simulation of SDS and SLAS assemblies                                | S2  |
| <b>Figure S2.</b> Micelle- $\alpha$ S complex formation during coarse-grained MD simulations                 | S3  |
| <b>Figure S3.</b> Sequence and spatial distribution of $\alpha$ S hydrophobicities                           | S4  |
| <b>Figure S4.</b> Evolution of structural parameter during CG MD simulations of micelle-bound $\alpha$ S     | S5  |
| <b>Figure S5.</b> Association of partially folded $\alpha$ S with micelles in all atom MD simulations        | S6  |
| <b>Figure S6.</b> MD simulations of free SDS and SLAS micelles at atomic resolution                          | S7  |
| <b>Figure S7.</b> Evolution of backbone dihedral angles of $\alpha$ S <sup>SDS</sup> <sub>NC</sub> residues  | S8  |
| <b>Figure S8.</b> Evolution of backbone dihedral angles of $\alpha$ S <sup>SLAS</sup> <sub>CN</sub> residues | S9  |
| <b>Figure S9.</b> Evolution of backbone dihedral angles of $\alpha$ S <sup>SLAS</sup> <sub>NC</sub> residues | S10 |
| <b>Figure S10.</b> Principal component analysis of $\alpha$ S-micelle complex CG-MD simulations              | S11 |
| <b>Figure S11.</b> Projections of CG MD trajectories on eigenvector planes                                   | S12 |
| <b>Figure S12.</b> Projections of RMSF along principal components                                            | S13 |
| <b>Table S1.</b> Micelle parameter of SLAS and SDS                                                           | S14 |
| <b>Table S2.</b> Coarse-grain topology for SLAS                                                              | S15 |
| <b>Table S3.</b> Summary of coarse-grained (CG) simulations                                                  | S16 |
| <b>Table S4.</b> Fine-grain topology for SLAS                                                                | S17 |
| <b>Supplemental References</b>                                                                               | S19 |

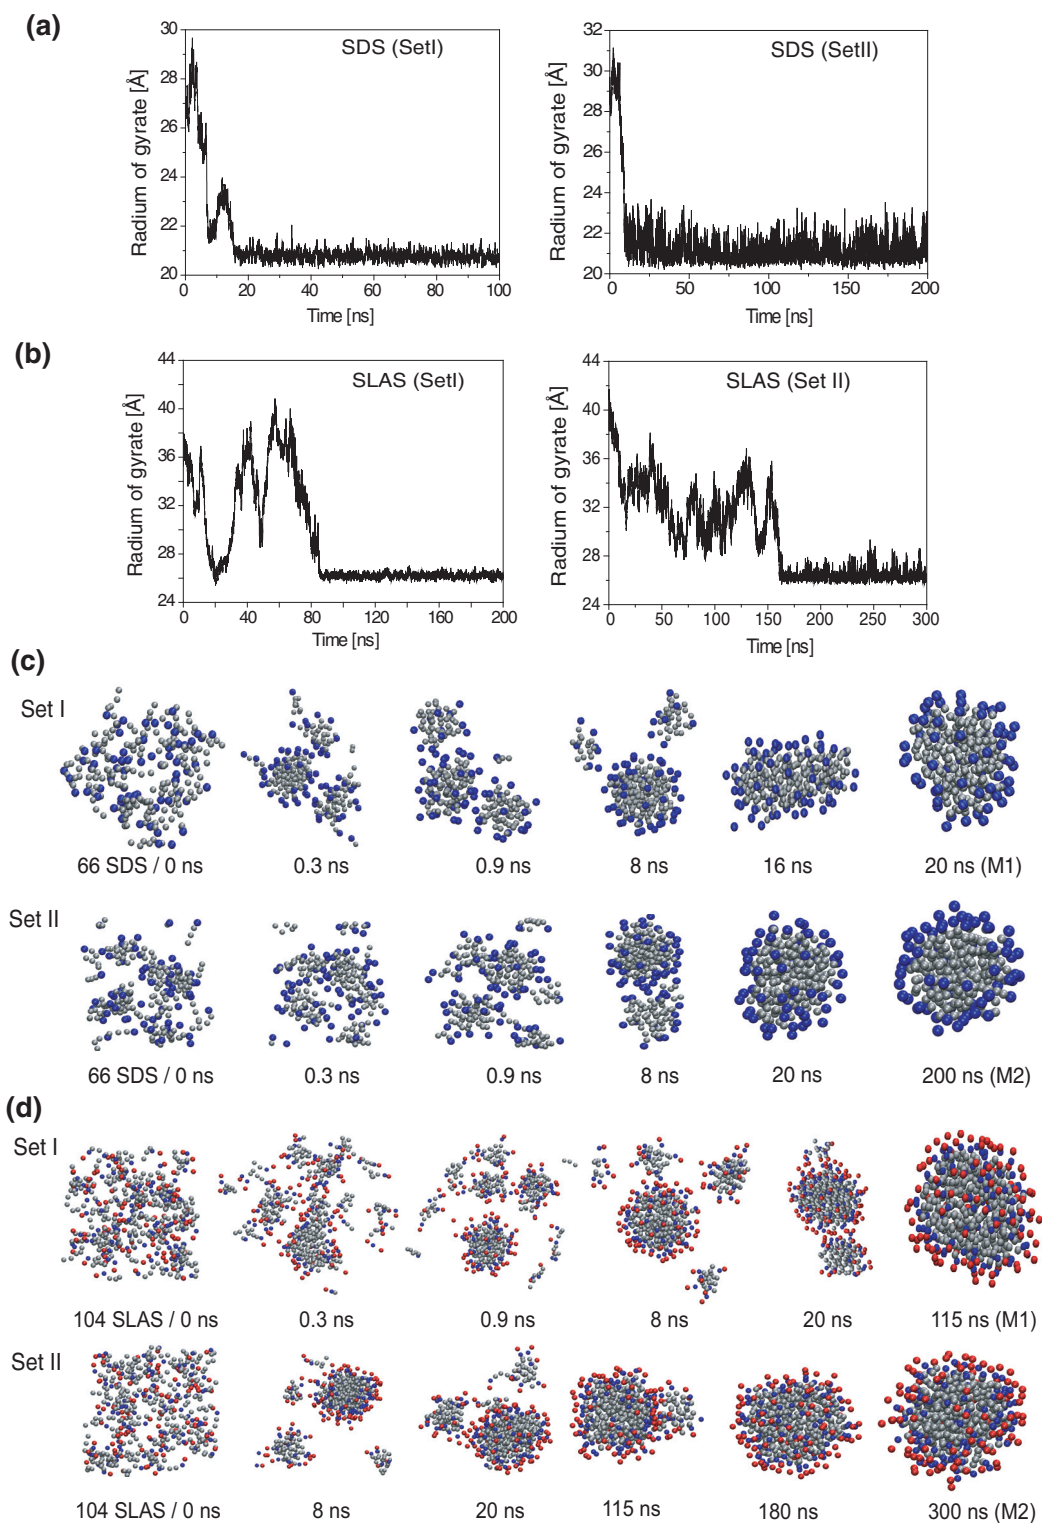

**Figure S1. Coarse-grain (CG) molecular dynamics simulations of SDS and SLAS micelle assembly.** (a-b) Average distance of head group beads from the center of micelle mass, radius of gyrate ( $R_g$ ), as a function of simulation time. (c-d) Snapshots of detergent associations at the simulation times indicated. Simulations started from two random detergent molecule distributions (sets I and II). The resulting micelles are denoted M1 and M2, respectively. For visual clarity, water and sodium ions are not shown.

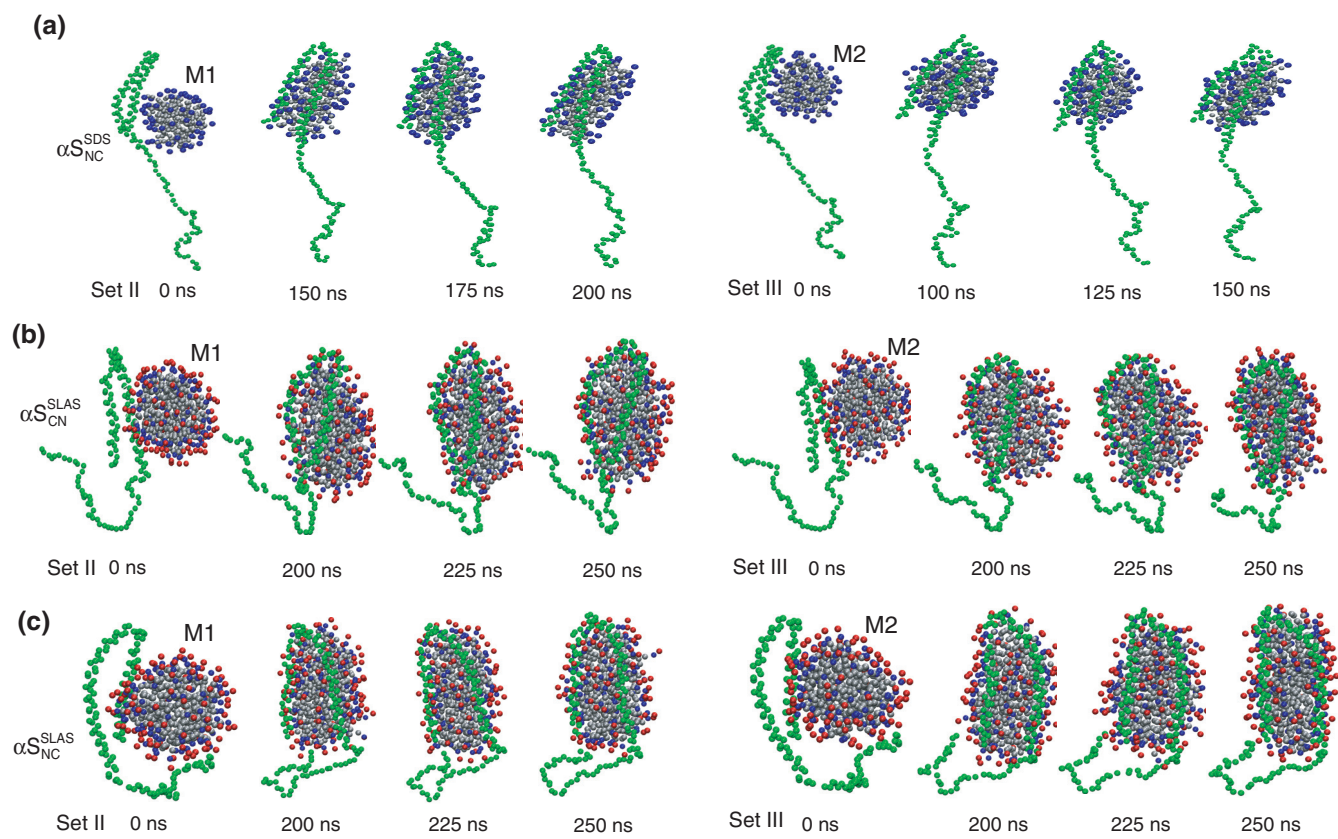

**Figure S2. Micelle- $\alpha S$  complex formation during coarse-grained molecular dynamics simulations.** (a-c) Complex formation of (a)  $\alpha S_{NC}^{SDS}$ , (b)  $\alpha S_{CN}^{SLAS}$  and (c)  $\alpha S_{NC}^{SLAS}$  with pre-equilibrated micelles M1 and M2 (see Figure S1). A first set of association simulations is depicted in Figure 3d-f.

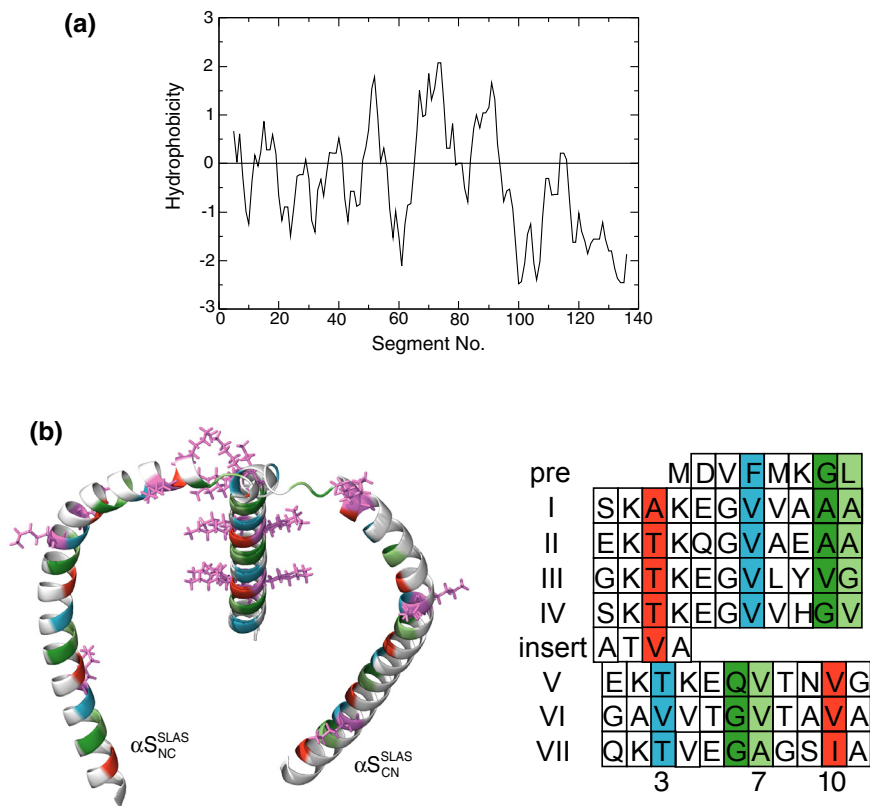

**Figure S3. Sequence and spatial distribution of  $\alpha$ S hydrophobicities.** (a) Sequence distribution of  $\alpha$ S hydrophobicity. The Kyte-Doolittle hydrophobicity scale was used with a window size of nine residues.<sup>1</sup> Center residues label segments. (b) Spatial distribution of membrane-facing residues for  $\alpha$ S<sup>SLAS</sup><sub>NC</sub> and  $\alpha$ S<sup>SLAS</sup><sub>CN</sub> structures. The residues that line the hydrophobic helix face are shown in color as depicted. The four-residue insert (Ala53-Ala56) changes the orientation of the membrane-facing helix faces with respect to its pseudorepeats sequence.<sup>2</sup>

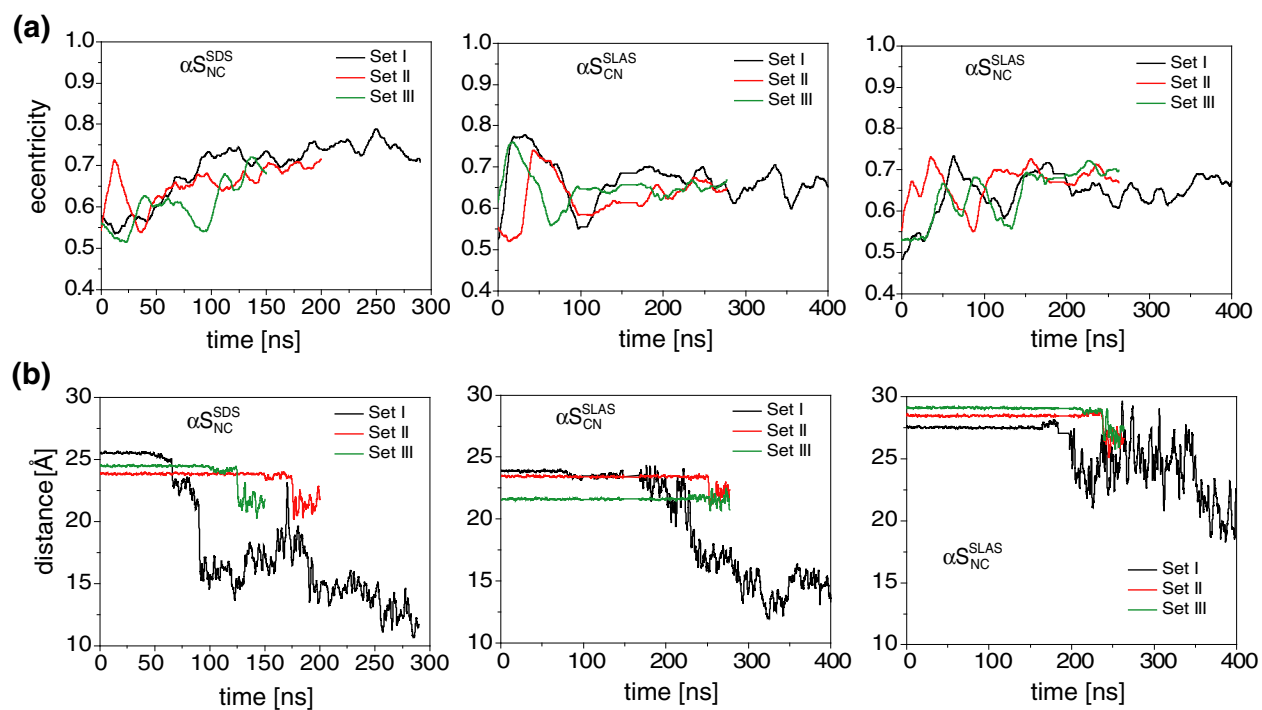

**Figure S4. Evolution of structural parameter during CG MD simulations of micelle-bound  $\alpha$ S.** (a) Micelle eccentricity and (b) distance between backbone beads of  $\alpha$ S residues A11 and V70 as a function of simulation time.

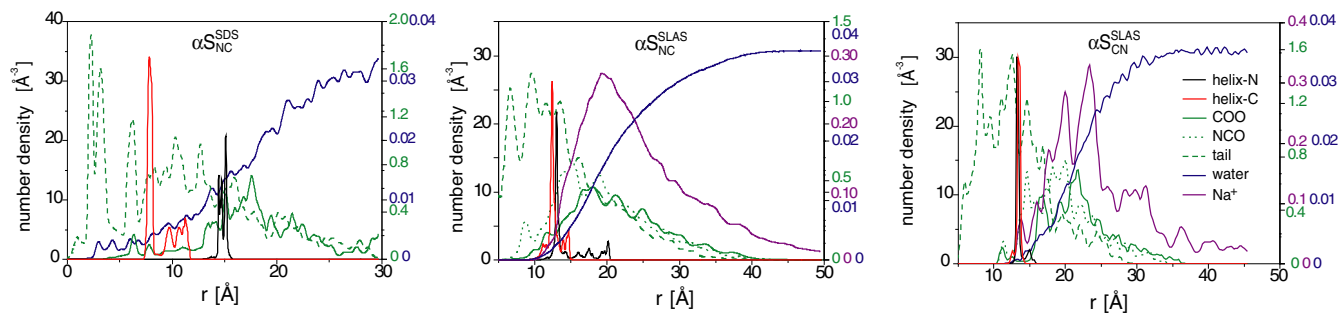

**Figure S5. Association of partially folded  $\alpha S$  with SDS and SLAS micelles in all atom MD simulations.** Number density profiles of the indicated groups relative to the center of micelle mass. Profiles for all-atom MD simulations calculated for the time period of 50-100 ns. For SDS- $\alpha S_{NC}^{SDS}$ , the Na<sup>+</sup> distribution formed was ill-dispersed with no clear maxima and, for visual clarity, omitted.

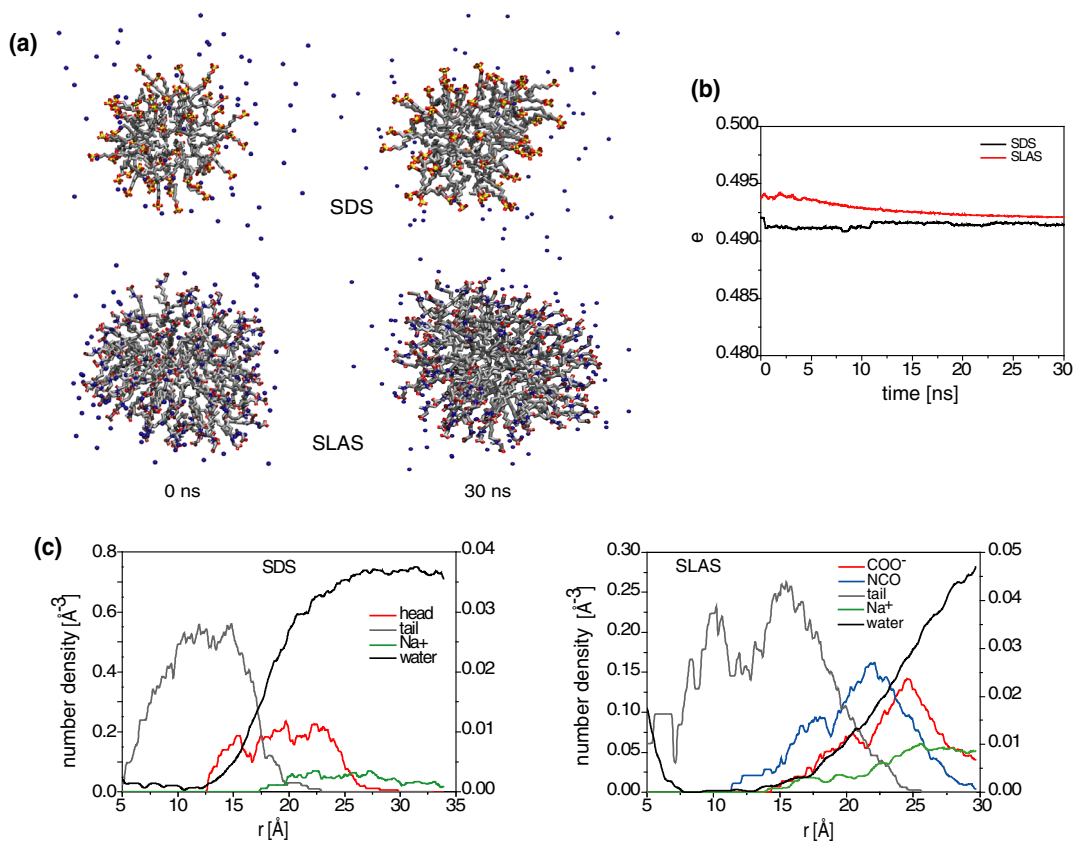

**Figure S6. MD simulations of free SDS and SLAS micelles at atomic resolution.** At the end of CG simulations (Figure S1a-b), CG configurations were transformed to atomistic coordinates using the reverse-transformation algorithm of GROMACS,<sup>3</sup> and all atom simulations were initiated. (a) Snapshots of detergent assemblies at the simulation times indicated. For clarity, water molecules were omitted. (b) Micelle eccentricity as a function of simulation time. (c) Number density profiles of the indicated groups relative to the micelle center of mass (COM) for the simulation period 5-30 ns.

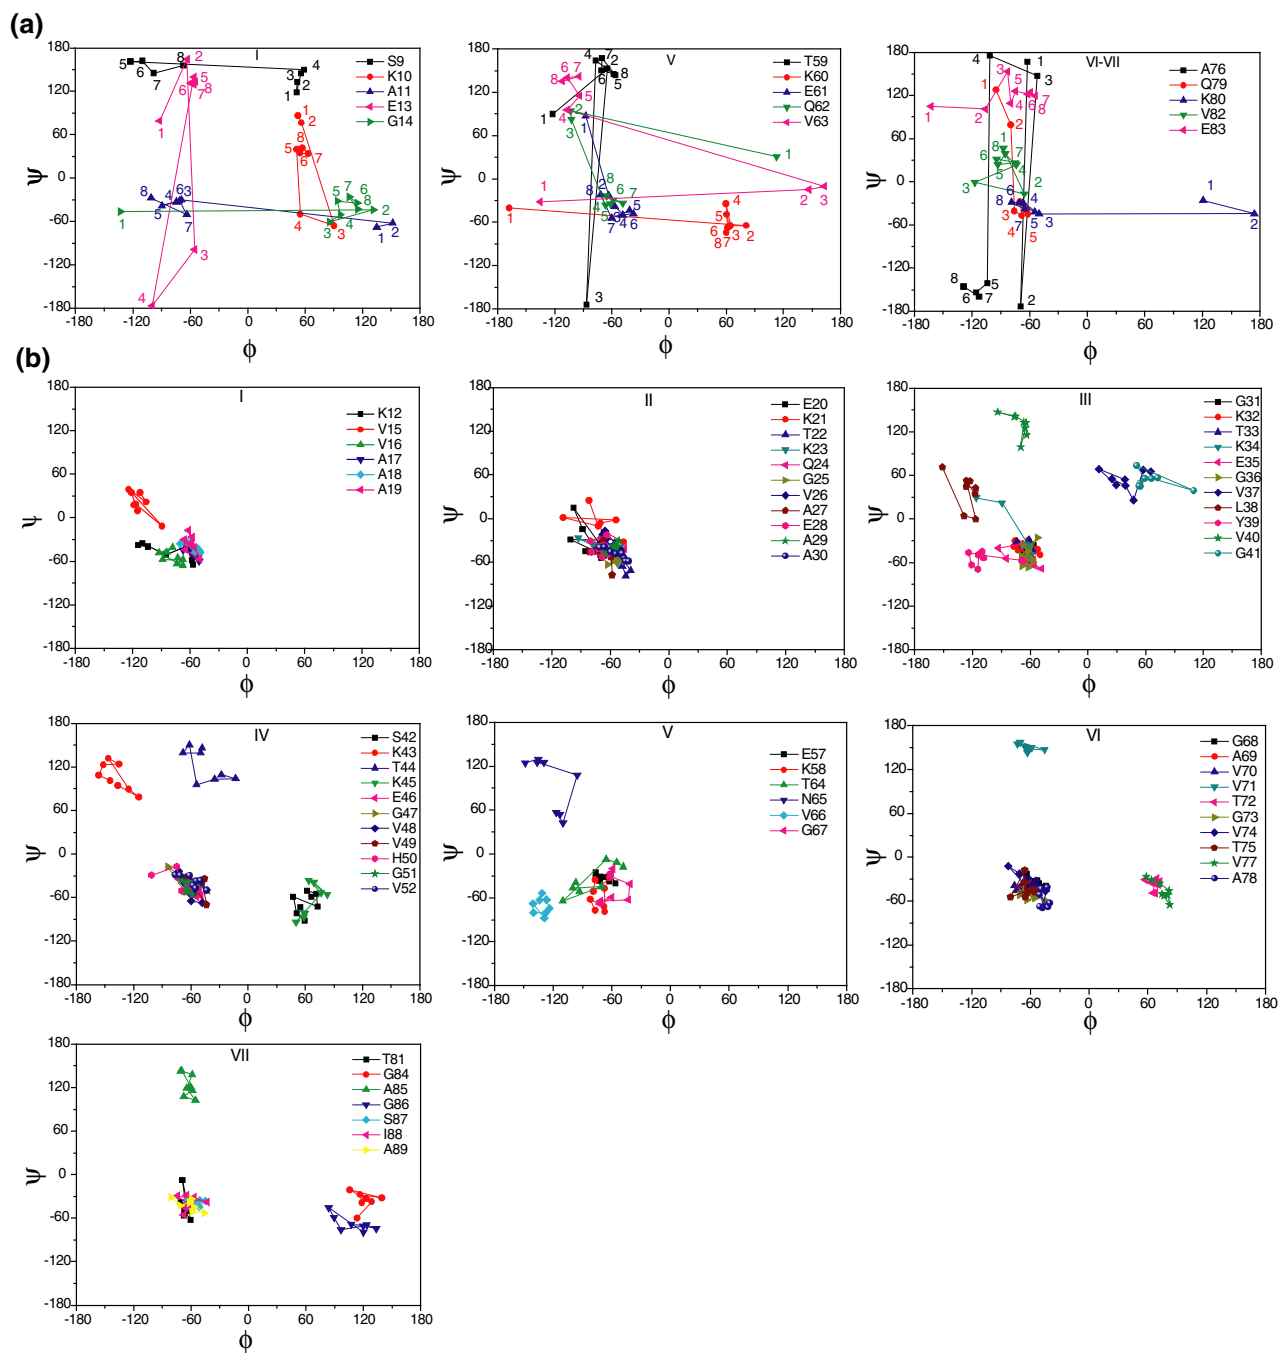

**Figure S7. Evolution of backbone dihedral angles of  $\alpha S^{\text{SDS}}_{\text{NC}}$  residues.** (a) For relatively mobile residues, dihedral angles are shown at 0 ns (label 1), 20 ns (label 2), 40 ns (label 3), 50 ns (label 4), 60 ns (label 5), 70 ns (label 6), 80 ns (label 7) and 100 ns (label 8). (b) For less mobile residues, the same time points are shown without labels. In all panels, residues were grouped according to their  $\alpha S$  pseudorepeat class (see Figure S3b).



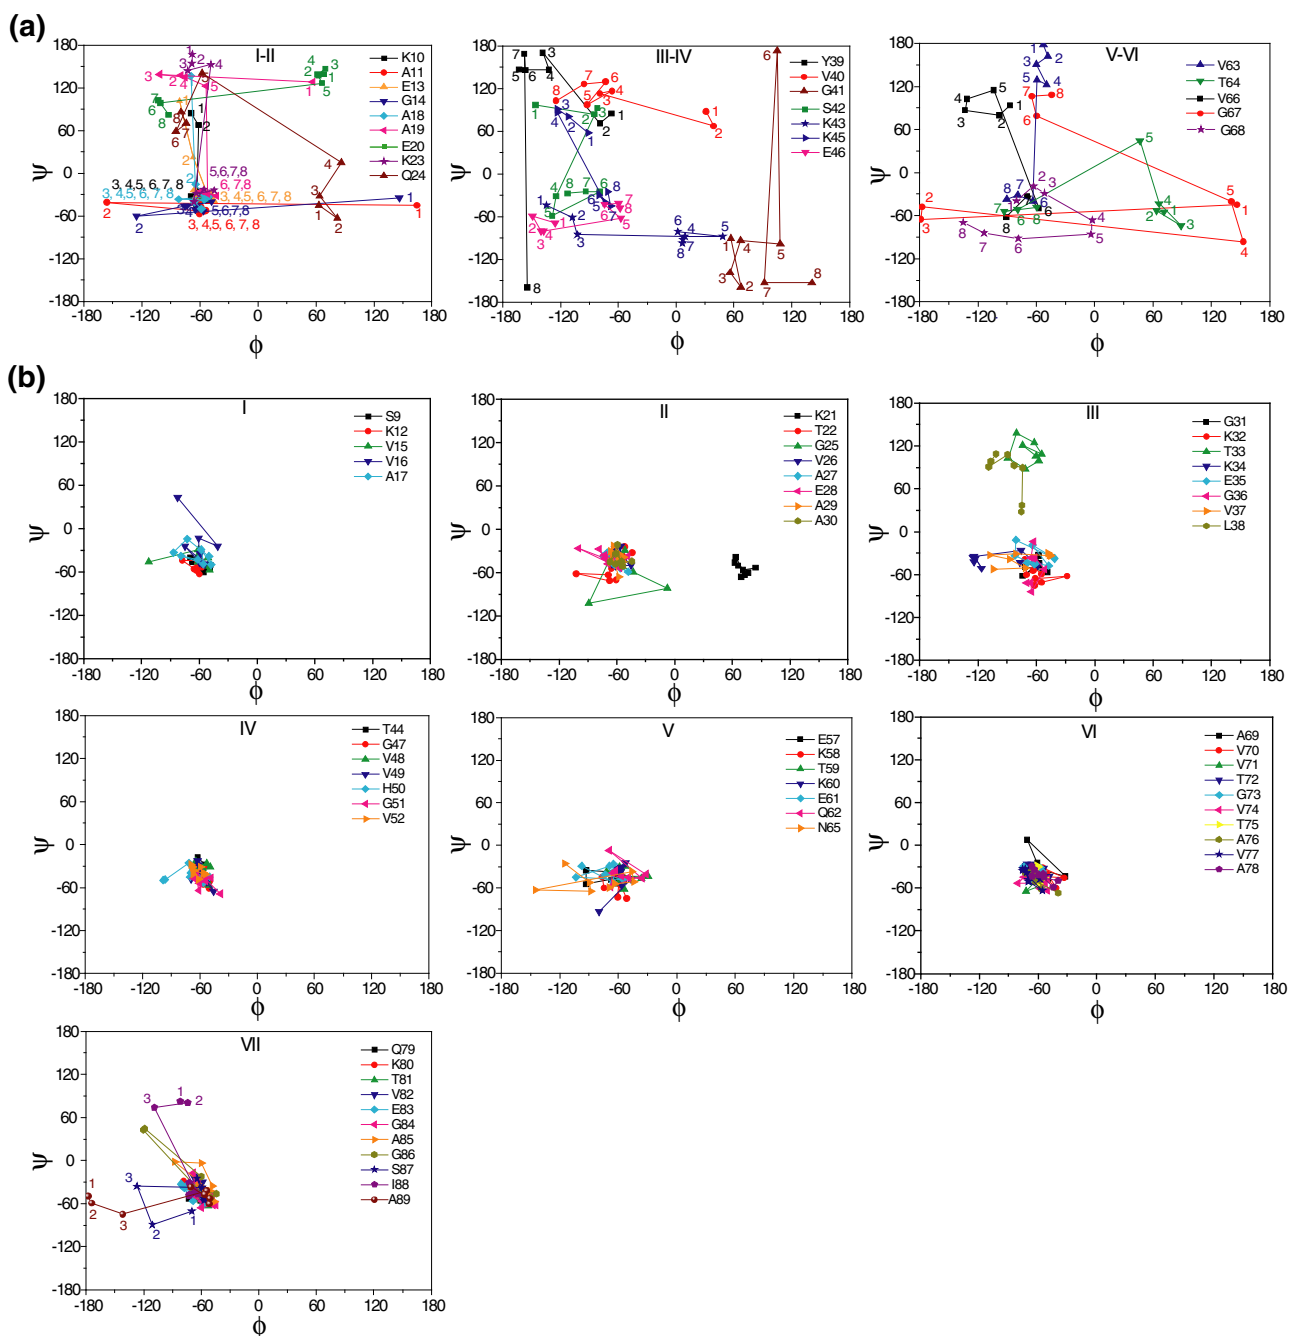

**Figure S8. Evolution of backbone dihedral angles of  $\alpha S^{\text{SLAS}}_{\text{CN}}$  residues.** (a) For relatively mobile residues, dihedral angles are shown at 0 ns (label 1), 20 ns (label 2), 40 ns (label 3), 50 ns (label 4), 60 ns (label 5), 70 ns (label 6), 80 ns (label 7) and 100 ns (label 8). (b) For less mobile residues, the same time points are shown without labels. In all panels, residues were grouped according to their  $\alpha S$  pseudorepeat class (see Figure S3b).

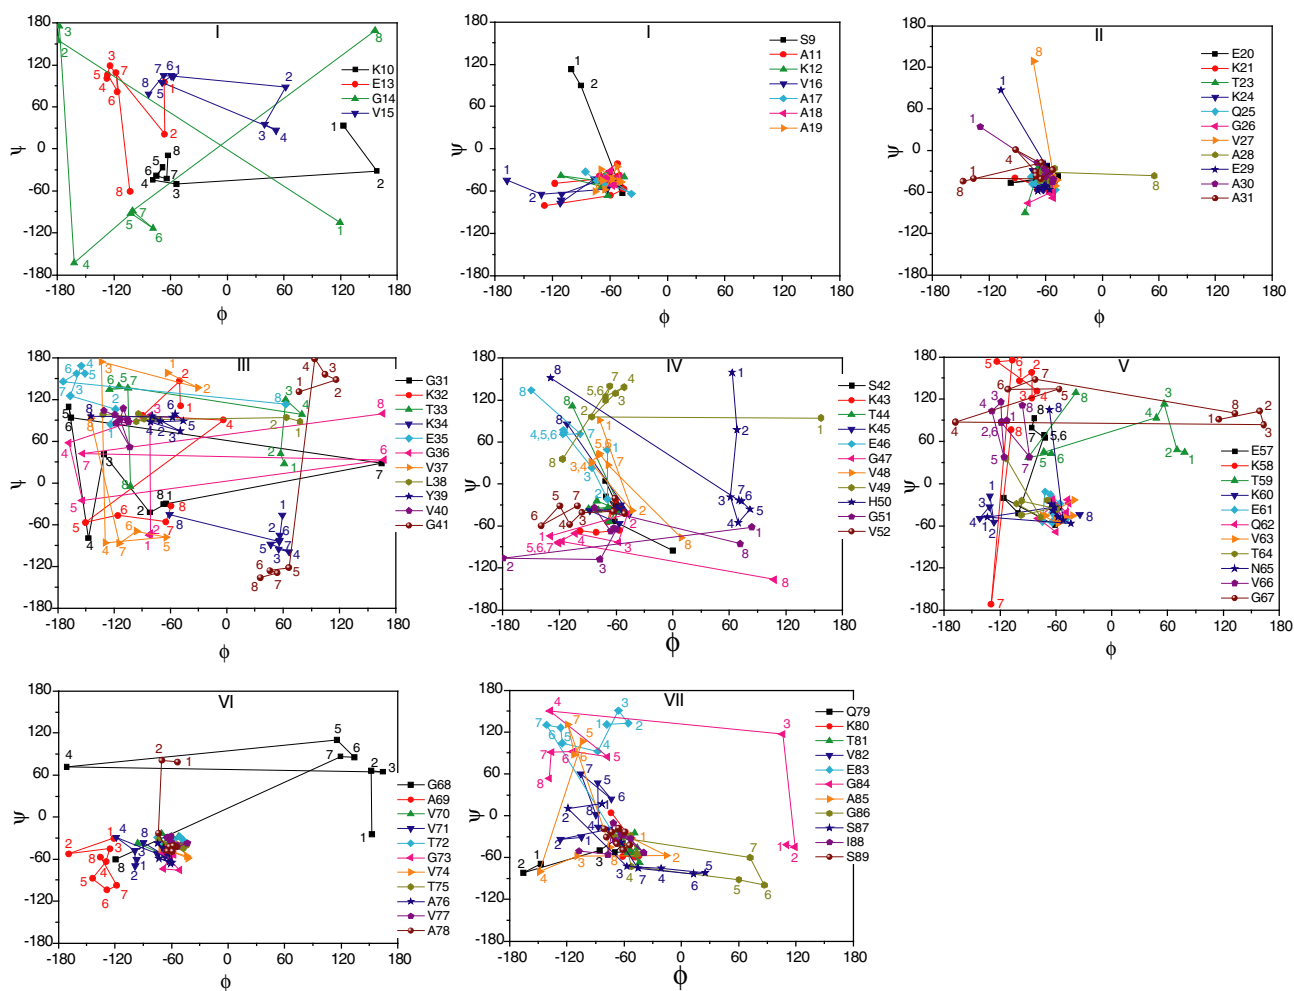

**Figure S9. Evolution of backbone dihedral angles of  $\alpha S^{\text{SLAS}}_{\text{NC}}$  residues.** Dihedral angles are shown at 0 ns (label 1), 20 ns (label 2), 40 ns (label 3), 50 ns (label 4), 60 ns (label 5), 70 ns (label 6), 80 ns (label 7) and 100 ns (label 8). In all panels, residues were grouped according to their  $\alpha S$  pseudorepeat class (see Figure S3b).

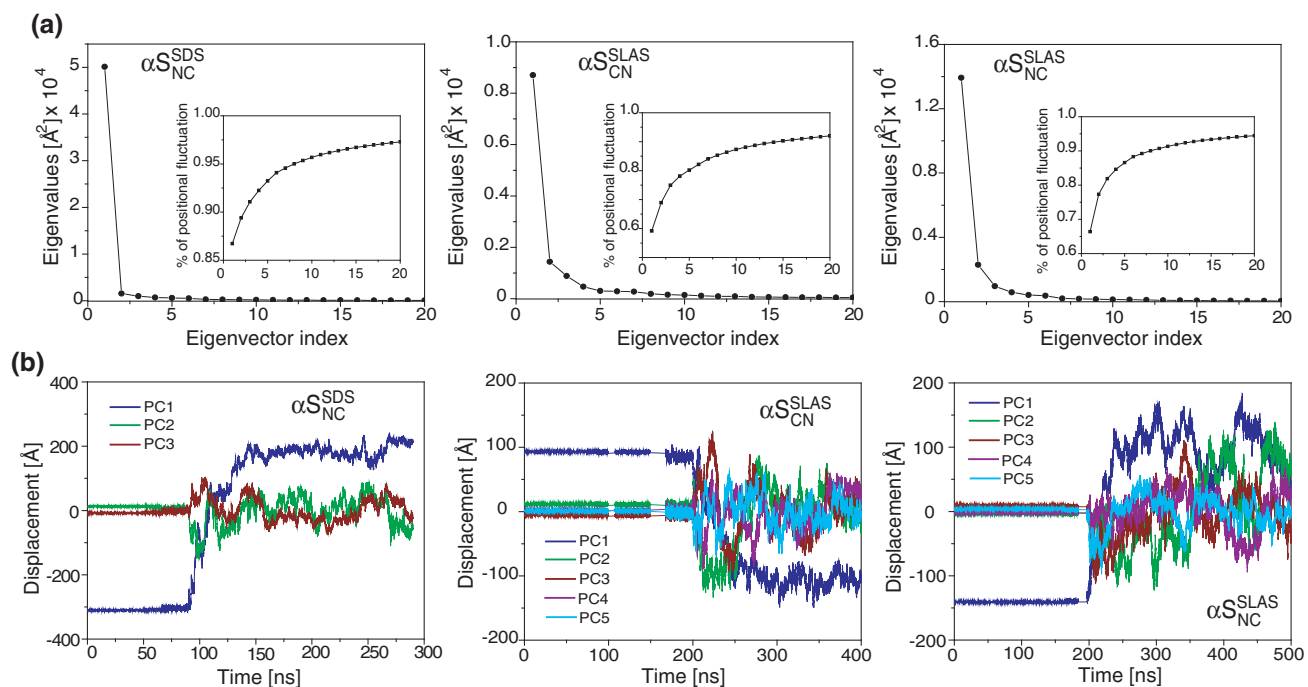

**Figure S10. Principal component analysis (PCA) of  $\alpha S$ -micelle complex CG-MD simulations.** (a) The 20 largest eigenvalues obtained for the simulations of Figure 3d-f shown in descending order. The inserts depict the percentage of fluctuations captured by the corresponding eigenvectors. (b) Fluctuations along the directions of the indicated eigenvector or principal components (PC) as a function of simulation time.

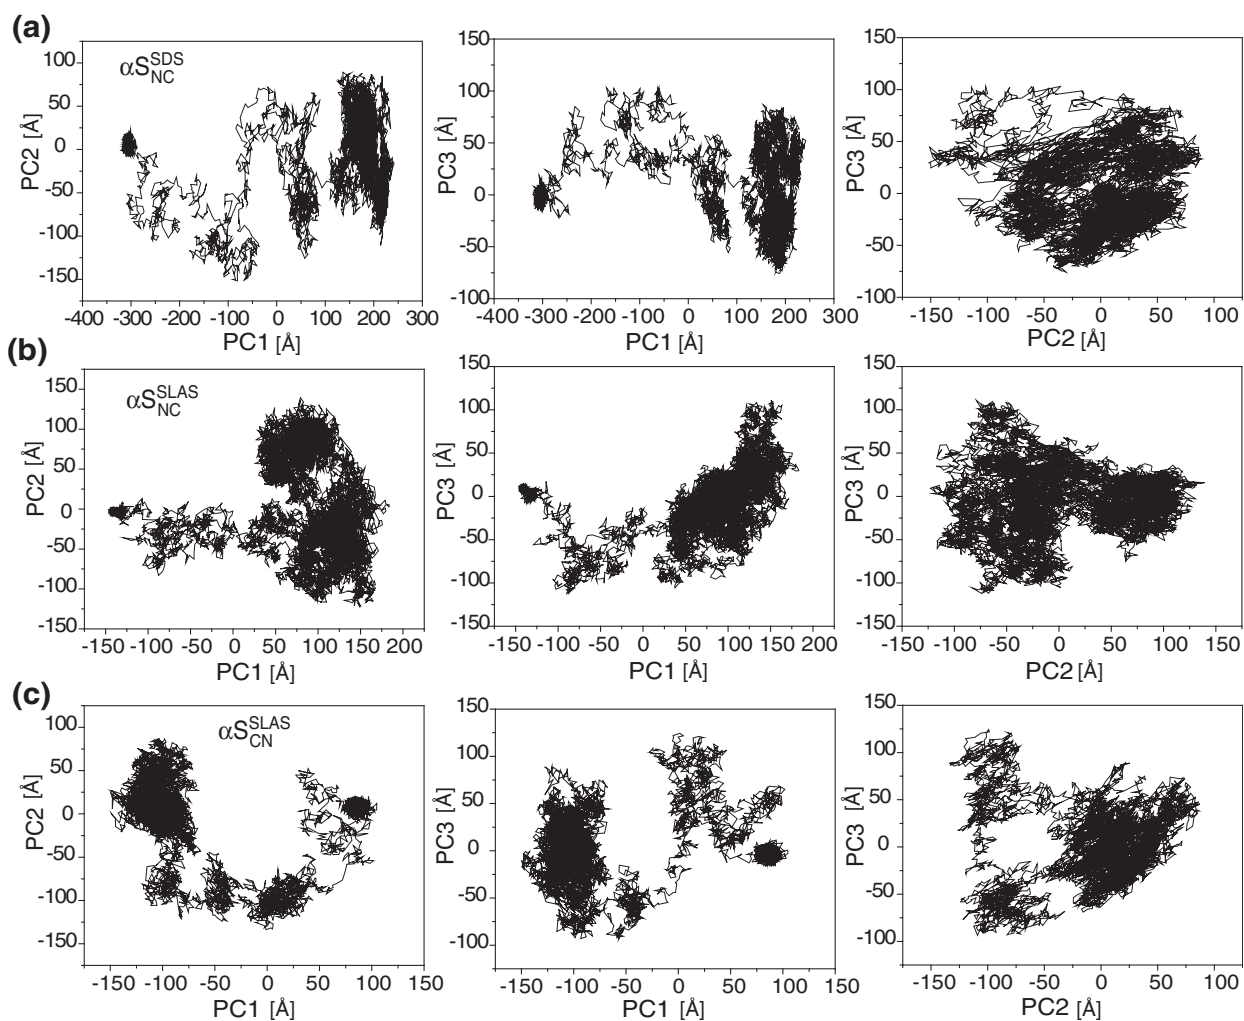

**Figure S11.** Projections of the (a)  $\alpha S_{NC}^{SDS}$ , (b)  $\alpha S_{NC}^{SLAS}$  and (c)  $\alpha S_{CN}^{SLAS}$  CG MD trajectories on planes defined by two principal components (eigenvectors) as indicated.

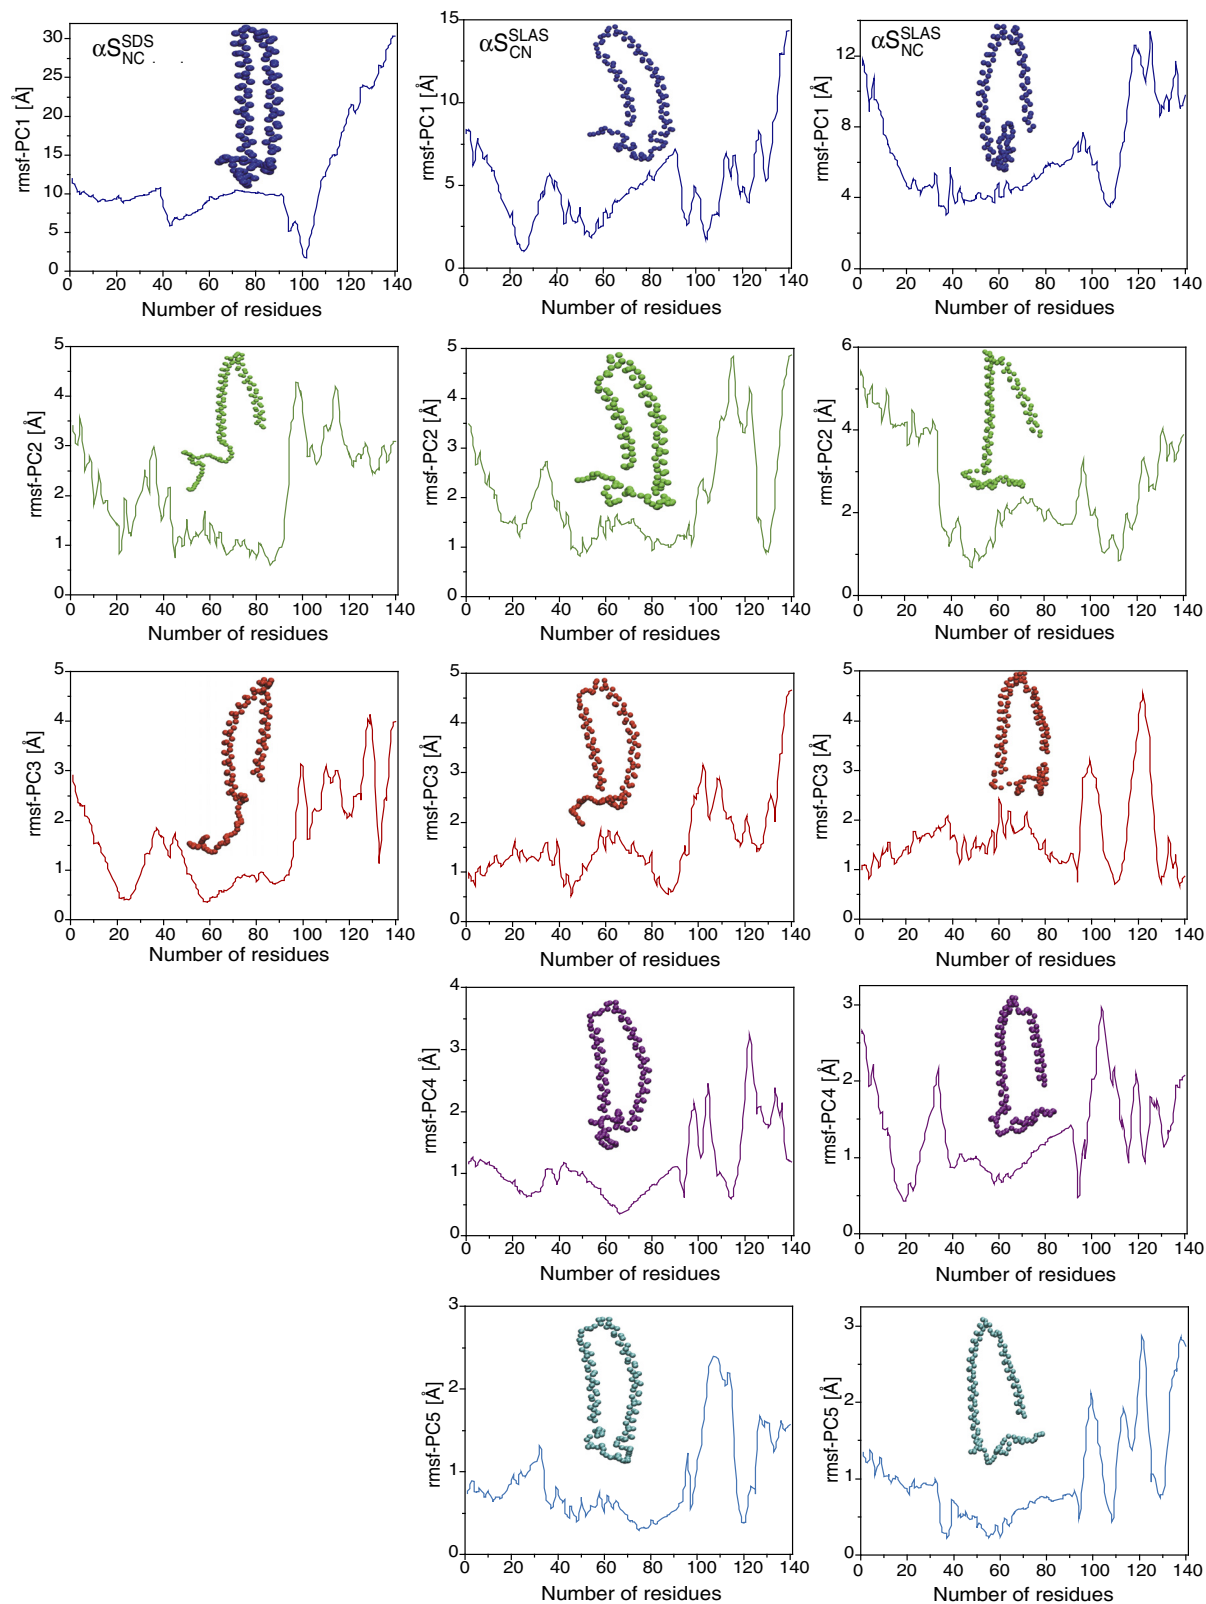

**Figure S13. Root-mean-square fluctuations (RMSF) of amino acid beads projected along the depicted principal components (PC) as a function of  $\alpha$ S residue number.**

**Table S1. Micelle parameter of SLAS and SDS.<sup>a</sup>**

| Detergent         | Radius [Å] | Mass [kDa] | Aggregation number |
|-------------------|------------|------------|--------------------|
| SLAS <sup>b</sup> | 22.2       | 30.6       | 104                |
| SDS               | 18.7       | 19.0       | 66                 |

<sup>a</sup>In 25 mM NaH<sub>2</sub>PO<sub>4</sub>/Na<sub>2</sub>HPO<sub>4</sub>, pH 7.4, solution.

<sup>b</sup>Values taken from Rao et al.<sup>2</sup>

**Table S2.** Coarse-grain topology for SLAS.

SLAS cg.itp

```
[ moleculetype ]
; molname      nrexcl
  SLA          1

[atoms]
; id   type   resnr   residu   atom   cgnr   charge
  1    Qa     1       SLA     COO    1      -1.0
  2    Na     1       SLA     NCO    2       0
  3    C2     1       SLA     C1     3       0
  4    C1     1       SLA     C2     4       0
  5    C1     1       SLA     C3     5       0

[bonds]
; i j   funct   length   force.c.
  1 2   1       0.47    1250
  2 3   1       0.47    1250
  3 4   1       0.47    1250
  4 5   1       0.47    1250

[angles]
; i j k     funct   angle   force.c.
  2 3 4     2       180.0  25.0
  3 4 5     2       180.0  25.0
```

SLAS CG.pdb

```
ATOM    1  COO  SLA    1      42.725  52.470  68.035  1.00  0.00
ATOM    2  NCO  SLA    1      43.187  52.533  63.096  1.00  0.00
ATOM    3  C1   SLA    1      44.103  51.565  59.097  1.00  0.00
ATOM    4  C2   SLA    1      43.251  48.483  55.518  1.00  0.00
ATOM    5  C3   SLA    1      45.554  46.307  51.858  1.00  0.00
TER
END
```

**Table S3. Summary of repeated coarse-grained (CG) simulations.**

| Simulation                                               | No. of water beads / atoms | Total no. of beads / atoms | Box dimension [ $\text{\AA}$ ] | Simulation time [ns] |
|----------------------------------------------------------|----------------------------|----------------------------|--------------------------------|----------------------|
| CG (micelle self-assembly) <sup>a,c</sup>                |                            |                            |                                |                      |
| SDS (M1)                                                 | 2,383                      | 2,713                      | 68×68×68                       | 100                  |
| (M2)                                                     | 2,391                      | 2,721                      | 65×65×65                       | 200                  |
| SLAS (M1)                                                | 8,630                      | 9,254                      | 100×100×100                    | 200                  |
| (M2)                                                     | 6,086                      | 6,710                      | 80×80×80                       | 300                  |
| CG (micelle pre-equilibrated) <sup>b,c</sup>             |                            |                            |                                |                      |
| SDS- $\alpha\text{S}_{\text{NC}}^{\text{SDS}}$ (set I)   | 6,739                      | 7,350                      | 60×240×60                      | 300                  |
| (set II)                                                 | 10,295                     | 10,906                     | 70×240×70                      | 200                  |
| (set III)                                                | 13,210                     | 13,821                     | 80×240×70                      | 150                  |
| SLAS- $\alpha\text{S}_{\text{CN}}^{\text{SLAS}}$ (set I) | 8,051                      | 8,956                      | 61×88×95                       | 400                  |
| (set II)                                                 | 18,318                     | 19,223                     | 100×120×160                    | 250                  |
| (set III)                                                | 19,935                     | 20,840                     | 100×140×160                    | 250                  |
| SLAS- $\alpha\text{S}_{\text{NC}}^{\text{SLAS}}$ (set I) | 10,008                     | 10,913                     | 120×100×100                    | 400                  |
| (set II)                                                 | 10,367                     | 11,272                     | 120×90×100                     | 250                  |
| (set III)                                                | 12,271                     | 13,176                     | 120×90×110                     | 250                  |

<sup>a</sup>M1 and M2 denotes the two micelle simulations of Figure S1.

<sup>b</sup>Three sets of  $\alpha\text{S}$ -micelle CG simulations were performed (Figure 3d-f and Figure S2).

<sup>c</sup>264 SDS, 520 SLAS and 272  $\alpha\text{S}$  beads were employed.



**Table S4.** Fine-grain topology for SLAS.

SLAS fg.itp

```
[ moleculetype ]
; Name nrexcl
SLA      3
```

```
[ atoms ]
;  nr      type  resnr resid  atom  cgnr  charge  mass
   1         O    1  SLA    O     1    -0.465  15.9994
   2         C    1  SLA   C1     1     0.380  12.0110
   3        OM    1  SLA   OM     1    -0.635  15.9994
   4       CH2    1  SLA   C2     1     0.000  14.0270
   5         N    1  SLA    N     1    -0.280  14.0067
   6       CH3    1  SLA   C3     2     0.000  15.0350
   7         C    1  SLA   C4     2     0.380  12.0110
   8         O    1  SLA    O     2    -0.380  15.9994
   9       CH2    1  SLA   C5     2     0.000  14.0270
  10       CH2    1  SLA   C6     2     0.000  14.0270
  11       CH2    1  SLA   C7     2     0.000  14.0270
  12       CH2    1  SLA   C8     2     0.000  14.0270
  13       CH2    1  SLA   C9     3     0.000  14.0270
  14       CH2    1  SLA  C10     3     0.000  14.0270
  15       CH2    1  SLA  C11     3     0.000  14.0270
  16       CH2    1  SLA  C12     3     0.000  14.0270
  17       CH2    1  SLA  C13     3     0.000  14.0270
  18       CH2    1  SLA  C14     3     0.000  14.0270
  19       CH3    1  SLA  C15     3     0.000  15.0350
```

```
[ bonds ]
; ai  aj  fu  c0, c1, ...
   2   1   2  0.125 13400000.0
   2   3   2  0.125 13400000.0
   2   4   2  0.153  7150000.0
   5   4   2  0.147  8710000.0
   5   6   2  0.147  8710000.0
   5   7   2  0.134 10500000.0
   7   8   2  0.136 10200000.0
   7   9   2  0.153  7150000.0
   9  10   2  0.153  7150000.0
  10  11   2  0.153  7150000.0
  11  12   2  0.153  7150000.0
  12  13   2  0.153  7150000.0
  13  14   2  0.153  7150000.0
  14  15   2  0.153  7150000.0
  15  16   2  0.153  7150000.0
  16  17   2  0.153  7150000.0
  17  18   2  0.153  7150000.0
  18  19   2  0.153  7150000.0
```

```
[ pairs ]
; ai  aj  fu  c0, c1, ...
   1   5   1
   2   6   1
   2   7   1
   3   5   1
   4   8   1
   4   9   1
   5  10   1
   6   8   1
```

|    |    |   |
|----|----|---|
| 6  | 9  | 1 |
| 7  | 11 | 1 |
| 8  | 10 | 1 |
| 9  | 12 | 1 |
| 10 | 13 | 1 |
| 11 | 14 | 1 |
| 12 | 15 | 1 |
| 13 | 16 | 1 |
| 14 | 17 | 1 |
| 15 | 18 | 1 |
| 16 | 19 | 1 |

[ angles ]

| ; ai | aj | ak | fu | c0, c1, ... |       |
|------|----|----|----|-------------|-------|
| 1    | 2  | 3  | 2  | 126.0       | 770.0 |
| 1    | 2  | 4  | 2  | 117.0       | 635.0 |
| 3    | 2  | 4  | 2  | 117.0       | 635.0 |
| 2    | 4  | 5  | 2  | 109.5       | 520.0 |
| 4    | 5  | 6  | 2  | 121.0       | 685.0 |
| 4    | 5  | 7  | 2  | 122.0       | 700.0 |
| 6    | 5  | 7  | 2  | 117.0       | 635.0 |
| 5    | 7  | 8  | 2  | 124.0       | 730.0 |
| 5    | 7  | 9  | 2  | 115.0       | 610.0 |
| 8    | 7  | 9  | 2  | 115.0       | 610.0 |
| 7    | 9  | 10 | 2  | 109.5       | 520.0 |
| 9    | 10 | 11 | 2  | 109.5       | 520.0 |
| 10   | 11 | 12 | 2  | 109.5       | 520.0 |
| 11   | 12 | 13 | 2  | 109.5       | 520.0 |
| 12   | 13 | 14 | 2  | 109.5       | 520.0 |
| 13   | 14 | 15 | 2  | 109.5       | 520.0 |
| 14   | 15 | 16 | 2  | 109.5       | 520.0 |
| 15   | 16 | 17 | 2  | 109.5       | 520.0 |
| 16   | 17 | 18 | 2  | 109.5       | 520.0 |
| 17   | 18 | 19 | 2  | 109.5       | 520.0 |

[ dihedrals ]

| ; ai | aj | ak | al | fu | c0, c1, m, ... |       |
|------|----|----|----|----|----------------|-------|
| 2    | 1  | 3  | 4  | 2  | 0.0            | 167.4 |
| 5    | 4  | 6  | 7  | 2  | 0.0            | 167.4 |
| 7    | 5  | 8  | 9  | 2  | 0.0            | 167.4 |
| 5    | 4  | 2  | 1  | 1  | 0.0            | 1.06  |
| 2    | 4  | 5  | 7  | 1  | 180.0          | 1.06  |
| 9    | 7  | 5  | 4  | 1  | 180.0          | 33.52 |
| 10   | 11 | 7  | 5  | 1  | 0.0            | 1.06  |
| 11   | 12 | 9  | 7  | 1  | 0.0            | 5.93  |
| 12   | 11 | 10 | 9  | 1  | 0.0            | 5.93  |
| 13   | 12 | 11 | 10 | 1  | 0.0            | 5.93  |
| 14   | 13 | 12 | 11 | 1  | 0.0            | 5.93  |
| 15   | 14 | 13 | 12 | 1  | 0.0            | 5.93  |
| 16   | 15 | 14 | 13 | 1  | 0.0            | 5.93  |
| 17   | 16 | 15 | 14 | 1  | 0.0            | 5.93  |
| 18   | 17 | 16 | 15 | 1  | 0.0            | 5.93  |
| 19   | 18 | 17 | 16 | 1  | 0.0            | 5.93  |

## Supplemental References

- (1) Kyte, J.; Doolittle, R. F. A Simple Method for Displaying the Hydrophobic Character of a Protein. *J. Mol. Biol.* **1982**, *157*, 105.
- (2) Rao, J. N.; Kim, Y. E.; Park, L. S.; Ulmer, T. S. Effect of Pseudorepeat Rearrangement on Alpha-Synuclein Misfolding, Vesicle Binding, and Micelle Binding. *J. Mol. Biol.* **2009**, *390*, 516-529.
- (3) Rzepiela, A. J.; Schafer, L. V.; Goga, N.; Risselada, H. J.; De Vries, A. H.; Marrink, S. J. Software News and Update Reconstruction of Atomistic Details from Coarse-Grained Structures. *J. Comput. Chem.* **2010**, *31*, 1333-1343.
